# Supplementary material
Source: Elsevier journal article supplement (https://www.sciencedirect.com/science/article/pii/S1699258X16300444)
Supplement: mmc1 [file S1699258X16300444:mmc1.pdf]

## Anexo A: Parámetros del modelo

### 1. Grupos ACG del aparato locomotor.

Tabla I - Grupos ACG utilizados en la clasificación de los episodios de aparato locomotor

| ACG                                             |
|-------------------------------------------------|
| Osteoporosis                                    |
| Síntomas/Signos musculoesqueléticos             |
| Esguinces                                       |
| Enfermedades articulares degenerativas          |
| Fracturas (excl. dedos)                         |
| Cervicalgias                                    |
| Cifoscoliosis                                   |
| Trastornos articulares traumáticos              |
| Anomalías congénitas de piernas, manos y pies   |
| Anomalías adquiridas de los pies                |
| Lumbalgia                                       |
| Bursitis, sinovitis, tenosinovitis              |
| Trastornos musculoesqueléticos, otros           |
| Patología del hombro                            |
| Patología de la rodilla                         |
| Enfermedades autoinmunes y del tejido conectivo |
| Gota                                            |

### 2. Parámetros y fuentes de información.

Tabla II - Parámetros utilizados en el modelo de SED y su origen

|                                                              |            | Fuente                                              |
|--------------------------------------------------------------|------------|-----------------------------------------------------|
| <b>Datos de derivación y consumo de recursos 2012 y 2014</b> |            |                                                     |
| - Consultas por episodios en AP                              |            | Bases de datos administrativas y clínicas de la OSI |
| - Episodios derivados desde AP                               |            |                                                     |
| - Origen de los episodios de AH                              |            |                                                     |
| - Consultas primeras y sucesivas por episodio en AH          |            |                                                     |
| - Episodios derivados a otras especialidades desde AH        |            |                                                     |
| <b>Datos de coste unitario 2012</b>                          |            |                                                     |
| - Consultas Atención Primaria                                | (31,73 €)  | Contabilidad analítica de la OSI                    |
| - Consultas Primeras Reumatología                            | (117,68 €) |                                                     |
| - Consultas Sucesivas Reumatología                           | (58,84 €)  |                                                     |
| - Consultas Primeras Rehabilitación                          | (86,43 €)  |                                                     |
| - Consultas Sucesivas Rehabilitación                         | (43,22 €)  |                                                     |
| - Consultas Primeras Traumatología                           | (110,67 €) |                                                     |
| - Consultas Sucesivas Traumatología                          | (55,33 €)  |                                                     |
| <b>Datos de evolución poblacional 2012-2020</b>              |            | EUSTAT                                              |

## **Anexo B: El modelo de simulación y su validación**

### **1. El modelo de simulación**

Se utilizó el *software* Arena® de Rockwell Automation para representar mediante la Simulación de Eventos Discretos (SED) el flujo de pacientes con patología osteomuscular y predecir la evolución del consumo de recursos y la carga económica desde 2012 hasta 2020. La SED es un método de modelado flexible que tiene la capacidad de representar comportamientos complejos e interacciones entre diferentes individuos, niveles y entornos. La flexibilidad que aporta permite considerar el tiempo explícitamente, asignar a cada paciente información específica y poder hacer uso de la teoría de colas, haciéndolo especialmente adecuado para este análisis. Por una parte, las afecciones osteomusculares contienen pacientes crónicos con una relación a largo plazo con el sistema sanitario por lo que la gestión explícita del tiempo es primordial. Por otra parte, existe limitación de recursos y, por tanto, hay que gestionar las colas o listas de espera. Por último, es necesario tener un modo de identificación de los pacientes, ya que cada uno seguirá un camino diferente dependiendo de la patología y los eventos ocurridos. Las funciones matemáticas para construir el modelo convencional se obtuvieron utilizando la información de las bases de datos de Osakidetza referente al año 2012. Al inicio de año existían pacientes que ya se encontraban dentro del sistema porque su episodio no se cerró en 2011. Para tener en cuenta estos episodios se realizó una carga inicial de pacientes antes de empezar con la simulación. Para representar el escenario del modelo integrado se agregaron los objetivos que se esperaban alcanzar estimados por el estudio Delphi. A la hora de realizar las proyecciones se tuvo en consideración el envejecimiento poblacional. Para ello, se calcularon las tasas de incidencia de cada uno de los grupos patológicos por grupo de edad y se multiplicaron por las proyecciones de población ofrecidas por el EUSTAT.

La historia natural de los pacientes se representó siguiendo el modelo conceptual descrito en la Figura 2. Ésta muestra las posibles rutas a seguir y los contactos que puede mantener cada uno de los pacientes que acuden al servicio sanitario de la OSI. La entrada a AH puede darse por tres orígenes diferentes: AP, urgencias o iniciativa propia. A cada individuo que entra al sistema se le asigna, además de sus características personales (sexo y edad), un ACG o grupo patológico. Una vez asignado el grupo, se define el camino que seguirán los individuos dentro del modelo. Como riesgo competitivo se incluye la posibilidad de fallecimiento. Los pacientes que entran a través de AP lo hacen pasando por la consulta del médico de cabecera. Dependiendo de cada caso, pueden tener más de una consulta y la necesidad de que se les realicen pruebas diagnósticas. Después de que los pacientes hayan realizado las consultas y

pruebas complementarias abandonarán el nivel primario, ya sea por alta médica o por que exista la necesidad de derivarlos al especialista. Por su parte, los individuos que acuden a través del servicio de urgencias o por iniciativa propia, pasarán directamente a AH. En cualquiera de los casos los pacientes que lleguen al nivel especializado se dirigirán a las consultas de Reumatología, Rehabilitación o Traumatología. En este nivel, al igual que en AP, los pacientes pueden necesitar varias consultas antes del alta médica para ser tratados o realizar diferentes pruebas diagnósticas. También puede darse el caso de que un especialista considere que la patología debe ser tratada por otra especialidad. De ser así, el individuo será derivado a la consulta correspondiente para seguir el proceso hasta ser dado de alta.

## 2. Validación de la especialidad de Reumatología

Tabla III - Validación de las consultas primeras, sucesivas y el ratio de Reumatología

|                                                 | Primeras |        | Sucesivas |        | Ratio |        |
|-------------------------------------------------|----------|--------|-----------|--------|-------|--------|
|                                                 | Real     | Modelo | Real      | Modelo | Real  | Modelo |
| Osteoporosis                                    | 85       | 80     | 130       | 124    | 1,5   | 1,6    |
| Síntomas/Signos musculoesqueléticos             | 79       | 77     | 83        | 82     | 1,1   | 1,1    |
| Esguinces                                       | 0        | 0      | 0         | 0      | 0     | 0      |
| Enfermedades articulares degenerativas          | 93       | 88     | 95        | 92     | 1     | 1      |
| Fracturas (excl. dedos)                         | 3        | 3      | 4         | 4      | 1,3   | 1,3    |
| Cervicalgias                                    | 0        | 0      | 0         | 0      | 0     | 0      |
| Cifoscoliosis                                   | 1        | 1      | 1         | 1      | 1     | 1      |
| Trastornos articulares traumáticos              | 0        | 0      | 0         | 0      | 0     | 0      |
| Anomalías congénitas de piernas, manos y pies   | 0        | 0      | 0         | 0      | 0     | 0      |
| Anomalías adquiridas de los pies                | 1        | 1      | 0         | 0      | 0     | 0      |
| Lumbalgia                                       | 12       | 12     | 7         | 7      | 0,6   | 0,6    |
| Bursitis, sinovitis, tenosinovitis              | 8        | 8      | 5         | 5      | 0,6   | 0,6    |
| Trastornos musculoesqueléticos, otros           | 3        | 3      | 27        | 25     | 9     | 8,3    |
| Patología del hombro                            | 20       | 17     | 35        | 32     | 1,8   | 1,9    |
| Patología de la rodilla                         | 7        | 7      | 11        | 10     | 1,6   | 1,4    |
| Enfermedades autoinmunes y del tejido conectivo | 122      | 114    | 846       | 808    | 6,9   | 7,1    |
| Gota                                            | 9        | 10     | 32        | 35     | 3,6   | 3,5    |

Tabla IV - Prueba de Bondad de Ajuste para las consultas primeras, sucesivas y el ratio de Reumatología

|                                             | Criterio    | Primeras | Sucesivas | Ratio |
|---------------------------------------------|-------------|----------|-----------|-------|
| <i>Correlation coefficient ( R )</i>        | (> 80,00)   | 0,94     | 0,94      | 0,94  |
| <i>Normalized mean squared error (NMSE)</i> | (< 0,5)     | 0,01     | 0,02      | 0,01  |
| <i>Fractional bias (FB)</i>                 | [-0,5, 0,5] | 0,05     | 0,04      | 0,02  |
| <i>Fractional variance (FV)</i>             | [-0,5, 0,5] | 0,06     | 0,05      | 0,07  |
| <i>Factor of two</i>                        | (> 80,00)   | 1        | 1         | 1     |

### 3. Validación de la especialidad de Rehabilitación

Tabla V - Validación de las consultas primeras, sucesivas y el ratio de Rehabilitación

|                                                 | Primeras |        | Sucesivas |        | Ratio |        |
|-------------------------------------------------|----------|--------|-----------|--------|-------|--------|
|                                                 | Real     | Modelo | Real      | Modelo | Real  | Modelo |
| Osteoporosis                                    | 1        | 1      | 2         | 2      | 2     | 2      |
| Síntomas/Signos musculoesqueléticos             | 147      | 137    | 199       | 198    | 1,4   | 1,4    |
| Esguinces                                       | 24       | 22     | 46        | 46     | 1,9   | 2,1    |
| Enfermedades articulares degenerativas          | 189      | 172    | 265       | 259    | 1,4   | 1,5    |
| Fracturas (excl. dedos)                         | 231      | 205    | 371       | 352    | 1,6   | 1,7    |
| Cervicalgias                                    | 227      | 207    | 250       | 245    | 1,1   | 1,2    |
| Cifoscoliosis                                   | 5        | 5      | 3         | 3      | 0,6   | 0,6    |
| Trastornos articulares traumáticos              | 26       | 23     | 52        | 50     | 2     | 2,2    |
| Anomalías congénitas de piernas, manos y pies   | 0        | 0      | 0         | 0      | 0     | 0      |
| Anomalías adquiridas de los pies                | 10       | 10     | 10        | 11     | 1     | 1,1    |
| Lumbalgia                                       | 207      | 187    | 234       | 227    | 1,1   | 1,2    |
| Bursitis, sinovitis, tenosinovitis              | 92       | 87     | 97        | 99     | 1,1   | 1,1    |
| Trastornos musculoesqueléticos, otros           | 103      | 91     | 174       | 166    | 1,7   | 1,8    |
| Patología del hombro                            | 459      | 420    | 651       | 635    | 1,4   | 1,5    |
| Patología de la rodilla                         | 145      | 131    | 169       | 164    | 1,2   | 1,3    |
| Enfermedades autoinmunes y del tejido conectivo | 15       | 11     | 28        | 22     | 1,9   | 2      |
| Gota                                            | 1        | 1      | 0         | 0      | 0     | 0      |

Tabla VI - Prueba de Bondad de Ajuste para las consultas primeras, sucesivas y el ratio de Rehabilitación

|                                             | Criterio    | Primeras | Sucesivas | Ratio |
|---------------------------------------------|-------------|----------|-----------|-------|
| <i>Correlation coefficient ( R )</i>        | (> 80,00)   | 0,94     | 0,94      | 0,94  |
| <i>Normalized mean squared error (NMSE)</i> | (< 0,5)     | 0,02     | 0         | 0,01  |
| <i>Fractional bias (FB)</i>                 | [-0,5, 0,5] | 0,1      | 0,03      | -0,07 |
| <i>Fractional variance (FV)</i>             | [-0,5, 0,5] | 0,09     | 0,03      | 0,09  |
| <i>Factor of two</i>                        | (> 80,00)   | 1        | 1         | 1     |

#### 4. Validación de la especialidad de Traumatología

Tabla VII - Validación de las consultas primeras, sucesivas y el ratio de Reumatología

|                                                 | Primeras |        | Sucesivas |        | Ratio |        |
|-------------------------------------------------|----------|--------|-----------|--------|-------|--------|
|                                                 | Real     | Modelo | Real      | Modelo | Real  | Modelo |
| Osteoporosis                                    | 42       | 39     | 182       | 184    | 4,3   | 4,7    |
| Síntomas/Signos musculoesqueléticos             | 354      | 326    | 844       | 831    | 2,4   | 2,5    |
| Esguinces                                       | 77       | 70     | 102       | 99     | 1,3   | 1,4    |
| Enfermedades articulares degenerativas          | 618      | 579    | 3.285     | 3.283  | 5,3   | 5,7    |
| Fracturas (excl. dedos)                         | 688      | 642    | 2.211     | 2.199  | 3,2   | 3,4    |
| Cervicalgias                                    | 189      | 173    | 354       | 346    | 1,9   | 2      |
| Cifoscoliosis                                   | 65       | 59     | 101       | 96     | 1,6   | 1,6    |
| Trastornos articulares traumáticos              | 138      | 132    | 101       | 101    | 0,7   | 0,8    |
| Anomalías congénitas de piernas, manos y pies   | 94       | 90     | 94        | 94     | 1     | 1      |
| Anomalías adquiridas de los pies                | 165      | 157    | 336       | 343    | 2     | 2,2    |
| Lumbalgia                                       | 690      | 644    | 2.086     | 2.078  | 3     | 3,2    |
| Bursitis, sinovitis, tenosinovitis              | 297      | 281    | 611       | 617    | 2,1   | 2,2    |
| Trastornos musculoesqueléticos, otros           | 421      | 388    | 1.180     | 1.159  | 2,8   | 3      |
| Patología del hombro                            | 487      | 460    | 843       | 852    | 1,7   | 1,9    |
| Patología de la rodilla                         | 1.014    | 943    | 1.820     | 1.798  | 1,8   | 1,9    |
| Enfermedades autoinmunes y del tejido conectivo | 76       | 73     | 145       | 148    | 1,9   | 2      |
| Gota                                            | 3        | 3      | 22        | 25     | 7,3   | 8,3    |

Tabla VIII - Prueba de Bondad de Ajuste para las consultas primeras, sucesivas y el ratio de Traumatología

|                                             | Criterio    | Primeras | Sucesivas | Ratio |
|---------------------------------------------|-------------|----------|-----------|-------|
| <i>Correlation coefficient ( R )</i>        | (> 80,00)   | 0,94     | 0,94      | 0,94  |
| <i>Normalized mean squared error (NMSE)</i> | (< 0,5)     | 0,01     | 0         | 0,01  |
| <i>Fractional bias (FB)</i>                 | [-0,5, 0,5] | 0,07     | 0         | -0,08 |
| <i>Fractional variance (FV)</i>             | [-0,5, 0,5] | 0,07     | 0,01      | 0,13  |
| <i>Factor of two</i>                        | (> 80,00)   | 1        | 1         | 1     |

## Anexo C: Resultados del análisis descriptivo y del análisis estadístico

### 1. Análisis descriptivo

El análisis descriptivo comparó las principales características sociodemográficas y clínicas de cada grupo (Tabla IX). Para 2012 mostró que los resultados se consiguieron a partir de 165 episodios observados de osteoporosis, 1.123 episodios de lumbalgia, 852 episodios de patología del hombro y 1.336 episodios de patología de la rodilla. Estos episodios acapararon el 37,1% de la carga total de AH. Para el año 2014 los episodios observados ascendieron a 300 en osteoporosis, 1.148 en lumbalgia, 977 en patología del hombro y 1.629 en patología de la rodilla, suponiendo el 38,4% de la carga. Los pacientes mayores de 80 años también aumentaron en un 1,4% para el año 2014.

Tabla IX - Características de la población diana en 2012 y 2014

|                         | 2012           | 2014           | p-valor <sup>a</sup> |
|-------------------------|----------------|----------------|----------------------|
| <b>Sexo</b>             | 29.176         | 30.118         |                      |
| Hombre                  | 12.461 (42,7%) | 13.316 (44,2%) | 0,00                 |
| Mujer                   | 16.715 (57,3%) | 16.802 (55,8%) |                      |
| <b>Edad</b>             | 29.176         | 30.118         |                      |
| < 80                    | 25.245 (86,5%) | 25.628 (85,1%) | 0,00                 |
| ≥ 80                    | 3.931 (13,5%)  | 4.490 (14,9%)  |                      |
| <b>Episodios en AH</b>  | 9.358          | 10.552         |                      |
| ACG No intervención     | 5.882 (62,9%)  | 6.498 (61,6%)  | 0,03                 |
| ACG Intervención        | 3.476 (37,1%)  | 4.054 (38,4%)  |                      |
| Osteoporosis            | 165            | 300            |                      |
| Lumbalgia               | 1.123          | 1.148          |                      |
| Patología del hombro    | 852            | 977            |                      |
| Patología de la rodilla | 1.336          | 1.629          |                      |

<sup>a</sup> Se ha calculado utilizando el test chi-cuadrado

### 2. Análisis estadístico

En el nivel especializado se observó una reducción del número de consultas por episodio en la mayoría de los casos. Se puede ver como aumentaron las consultas únicas o de alta resolución para cada especialidad, mientras que los episodios con más de 5 consultas se redujeron (Tabla X). Este cambio fue estadísticamente significativo para la especialidad de Traumatología en los grupos patológicos de lumbalgia, hombro y rodilla. Esto se debió a que fueron las patologías más trabajadas.

Tabla X - Análisis estadístico univariante del número de consultas por episodio para cada especialidad hospitalaria en 2012 y 2014

|                         |     | 2012        | 2014        | p-valor <sup>a</sup> |
|-------------------------|-----|-------------|-------------|----------------------|
| Osteoporosis            |     |             |             |                      |
| Reumatología            | 1   | 44 (51,2%)  | 88 (42,5%)  | 0,38                 |
|                         | 2-5 | 41 (47,7%)  | 117 (56,5%) |                      |
|                         | > 5 | 1 (1,2%)    | 2 (1,0%)    |                      |
| Rehabilitación          | 1   | 2 (40,0%)   | 6 (20,7%)   | 0,33                 |
|                         | ≥ 2 | 3 (60,0%)   | 23 (79,3%)  |                      |
| Traumatología           | 1   | 37 (41,6%)  | 49 (45,8%)  | 0,74                 |
|                         | 2-5 | 45 (50,6%)  | 52 (48,6%)  |                      |
|                         | > 5 | 7 (7,9%)    | 6 (5,6%)    |                      |
| Lumbalgia               |     |             |             |                      |
| Reumatología            | 1   | 7 (24,1%)   | 29 (44,6%)  | 0,05                 |
|                         | ≥ 2 | 22 (75,9%)  | 36 (55,4%)  |                      |
| Rehabilitación          | 1   | 60 (28,3%)  | 112 (34,6%) | 0,01                 |
|                         | 2-5 | 142 (67,0%) | 209 (64,5%) |                      |
|                         | > 5 | 10 (4,7%)   | 3 (0,9%)    |                      |
| Traumatología           | 1   | 287 (28,2%) | 324 (33,6%) | 0,00                 |
|                         | 2-5 | 645 (63,5%) | 602 (62,4%) |                      |
|                         | > 5 | 84 (8,3%)   | 39 (4,0%)   |                      |
| Patología del hombro    |     |             |             |                      |
| Reumatología            | 1   | 10 (31,3%)  | 15 (23,8%)  | 0,31                 |
|                         | 2-5 | 20 (62,5%)  | 47 (74,6%)  |                      |
|                         | > 5 | 2 (6,3%)    | 1 (1,6%)    |                      |
| Rehabilitación          | 1   | 103 (25,0%) | 178 (33,5%) | 0,00                 |
|                         | 2-5 | 292 (70,9%) | 346 (65,0%) |                      |
|                         | > 5 | 17 (4,1%)   | 8 (1,5%)    |                      |
| Traumatología           | 1   | 229 (38,1%) | 254 (41,4%) | 0,03                 |
|                         | 2-5 | 339 (56,4%) | 343 (56,0%) |                      |
|                         | > 5 | 33 (5,5%)   | 16 (2,6%)   |                      |
| Patología de la rodilla |     |             |             |                      |
| Reumatología            | 1   | 11 (52,4%)  | 27 (39,7%)  | 0,22                 |
|                         | ≥ 2 | 10 (47,6%)  | 41 (60,3%)  |                      |
| Rehabilitación          | 1   | 49 (33,8%)  | 123 (38,4%) | 0,09                 |
|                         | 2-5 | 89 (61,4%)  | 192 (60,0%) |                      |
|                         | > 5 | 7 (4,8%)    | 5 (1,6%)    |                      |
| Traumatología           | 1   | 486 (38,3%) | 590 (39,4%) | 0,00                 |
|                         | 2-5 | 718 (56,6%) | 878 (58,6%) |                      |
|                         | > 5 | 65 (5,1%)   | 30 (2,0%)   |                      |

<sup>a</sup> Se ha calculado el chi-cuadrado categorizando los episodios en tres grupos (1 consulta, 2-5 consultas, >5 consultas). Para los grupos que no tienen episodios con más de 5 consultas la categorización se ha realizado en dos grupos (1 consulta, ≥2 consultas)
